# Supplementary material for: Influenza A(H7N9) Virus Acquires Resistance-Related Neuraminidase I222T Substitution When Infected Mallards Are Exposed to Low Levels of Oseltamivir in Water
Source: PubMed Central journal article supplement — Antimicrob Agents Chemother. 2015 Aug 14;59(9):5196–202. doi: 10.1128/AAC.00886-15 (PMC4538561; doi:10.1128/aac.00886-15), 2015-08-14
Supplement: AAC.00886-15_zac009154285so1.pdf [file AAC.00886-15_zac009154285so1.pdf]

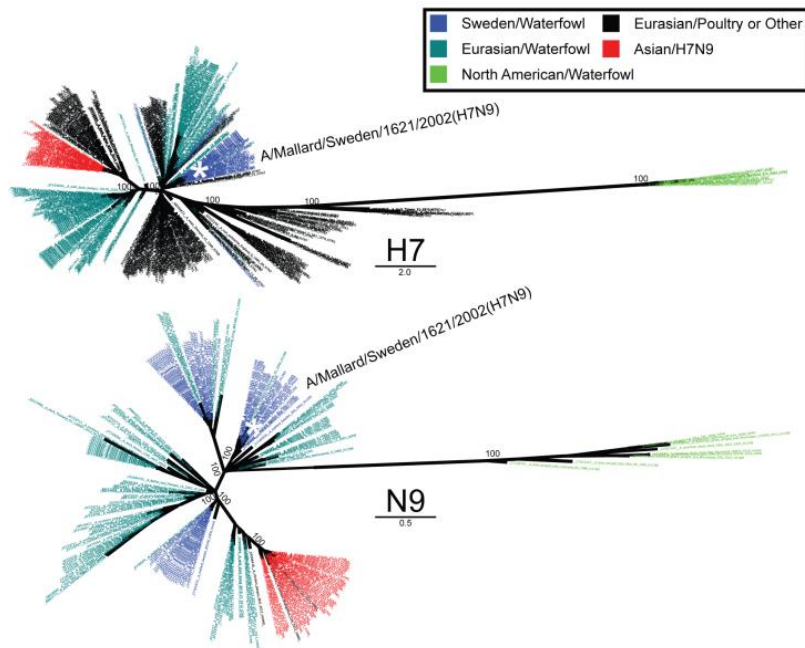

1

2 Figure S1: HA and NA phylogenetic trees of Eurasian H7 and N9 virus segments. Phylogenetic  
 3 placement of the virus used in this study is denoted by an asterisk (\*), and the different  
 4 colors correspond to geographical or host species groupings. Scale bar represents number of  
 5 substitutions per site. Posterior probabilities of major clades are included at corresponding  
 6 nodes.

7

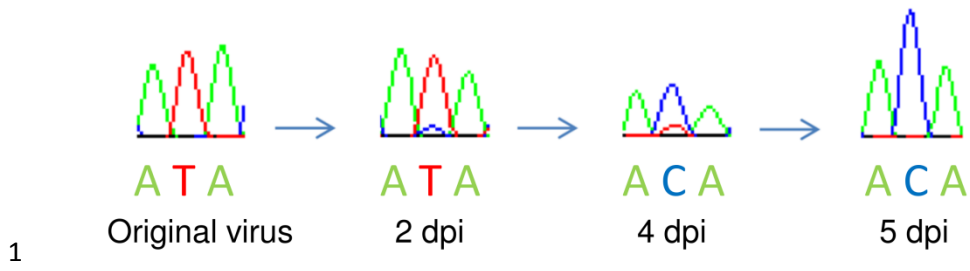

2 Figure S2. Electropherograms from Sanger sequencing over the N9 codon for amino acid  
 3 residue 222. Presented sequences are from IAV isolates of fecal samples from a Mallard in  
 4 generation one, i.e. one of the birds present from the start of the experiment. 2 dpi = 2 days  
 5 post inoculation etc. ATA codes for isoleucine (I) and ACA for threonine (T).

6

1 Table S1. Primers for the amplification and sequencing of neuraminidase N9.

| <b>Primer</b> | <b>Sequence (5' to 3')</b> | <b>Application</b> |
|---------------|----------------------------|--------------------|
| N9_FWy        | TCTATGCACTTCAGCCACTGCTA    | NA-PCR, sequencing |
| N9_FWi2       | TCACCGCCCACAGTATACAA       | sequencing         |
| N9_REVy (ic)  | ATCAGGCCAGTTCATTGTCCTA     | NA-PCR, sequencing |
| N9_REVi (ic)  | TACCTGGATAAGGGTCATTACACT   | sequencing         |

2
